# Supplementary material
Source: PubMed Central journal article supplement (PMC3245853)
Supplement: NIHMS38602-supplement-Supplementary_data.pdf [file NIHMS38602-supplement-Supplementary_data.pdf]

## **SUPPLEMENTAL MATERIAL**

**Table 3** - ED thicknesses of trabeculated, compacted and total layer and trabeculated/compacted ratio in female and male subjects

(Data is presented as mean±SEM) Trab = trabecular, C = compacted, F = female, M = male, na=not applicable, 0\*=measurement <0.01, thus, not of clinical utility.

| Segment | Trabeculated |         | <i>p</i> | Compacted |          | <i>p</i> | Total layer |          | <i>p</i> | Trab/C ratio |         | <i>p</i> |
|---------|--------------|---------|----------|-----------|----------|----------|-------------|----------|----------|--------------|---------|----------|
|         | F            | M       |          | F         | M        |          | F           | M        |          | F            | M       |          |
| 1       | 2.5±0.3      | 3.1±0.3 | 0.29     | 7.1±0.2   | 8.6±0.2  | <0.01    | 9.5±0.4     | 11.7±0.4 | <0.01    | 0.3±0.0      | 0.3±0.0 | 0.92     |
| 2       | 0.1±0.1      | 0       | 0.38     | 8.6±0.3   | 10.5±0.3 | <0.01    | 8.6±0.3     | 10.5±0.3 | <0.01    | 0*           | 0*      | 0.33     |
| 3       | 0            | 0       | na       | 7.8±0.2   | 9.6±0.2  | <0.01    | 7.8±0.2     | 9.6±0.2  | <0.01    | 0            | 0       | na       |
| 4       | 0.3±0.1      | 0.4±0.1 | 0.54     | 6.9±0.2   | 8.5±0.2  | <0.01    | 7.0±0.2     | 8.9±0.2  | <0.01    | 0*           | 0*      | 0.97     |
| 5       | 1.9±0.3      | 1.8±0.3 | 0.79     | 6.3±0.2   | 7.7±0.2  | <0.01    | 8.2±0.3     | 9.5±0.3  | <0.01    | 0.3±0.0      | 0.2±0.0 | 0.22     |
| 6       | 1.9±0.3      | 1.9±0.3 | 0.91     | 6.3±0.1   | 7.7±0.2  | <0.01    | 8.2±0.3     | 9.7±0.3  | <0.01    | 0.3±0.0      | 0.3±0.0 | 0.53     |
| 7       | 5.3±0.4      | 6.0±0.4 | 0.22     | 6.1±0.2   | 7.2±0.2  | <0.01    | 11.4±0.4    | 13.2±0.4 | <0.01    | 0.9±0.0      | 0.8±0.0 | 0.38     |
| 8       | 0.6±0.2      | 0.4±0.2 | 0.39     | 7.1±0.2   | 8.6±0.2  | <0.01    | 7.8±0.2     | 9.0±0.2  | <0.01    | 0*           | 0*      | 0.27     |
| 9       | 0            | 0       | na       | 7.4±0.2   | 8.8±0.2  | <0.01    | 7.3±0.2     | 8.8±0.2  | <0.01    | 0            | 0       | na       |

---

|    |         |         |      |         |         |       |          |          |       |         |         |      |
|----|---------|---------|------|---------|---------|-------|----------|----------|-------|---------|---------|------|
| 10 | 1.6±0.3 | 1.0±0.3 | 0.20 | 6.5±0.2 | 7.7±0.1 | <0.01 | 7.5±0.4  | 8.8±0.3  | <0.01 | 0.1±0.0 | 0.1±0.0 | 0.06 |
| 11 | 4.0±0.4 | 4.4±0.3 | 0.44 | 5.7±0.1 | 6.8±0.1 | <0.01 | 9.8±0.4  | 11.2±0.3 | <0.01 | 0.7±0.1 | 0.7±0.0 | 0.79 |
| 12 | 4.4±0.4 | 4.5±0.3 | 0.81 | 5.6±0.2 | 6.9±0.1 | <0.01 | 9.9±0.4  | 11.4±0.3 | <0.01 | 0.8±0.1 | 0.7±0.1 | 0.13 |
| 13 | 5.5±0.3 | 5.9±0.3 | 0.42 | 6.0±0.2 | 6.5±0.2 | <0.05 | 11.0±0.4 | 12.4±0.4 | <0.05 | 0.9±0.1 | 0.9±0.2 | 0.98 |
| 14 | 0.7±0.3 | 0.7±0.2 | 0.98 | 6.6±0.2 | 7.9±0.2 | <0.01 | 7.3±0.3  | 8.7±0.3  | <0.01 | 0.1±0.0 | 0.1±0.0 | 0.61 |
| 15 | 2.3±0.3 | 2.1±0.3 | 0.76 | 5.7±0.2 | 6.6±0.2 | <0.01 | 8.0±0.3  | 8.7±0.2  | <0.05 | 0.4±0.1 | 0.3±0.1 | 0.29 |
| 16 | 6.7±0.3 | 7.6±0.3 | 0.05 | 5.9±0.2 | 6.4±0.2 | <0.05 | 12.5±0.4 | 14.0±0.4 | <0.05 | 1.1±0.1 | 1.2±0.1 | 0.54 |

---

**Table 4** - ES thicknesses of trabeculated, compacted and total layer and trabeculated/compacted ratio in female and male subjects

| Segment | Trabeculated |         | <i>p</i> | Compacted |          | <i>p</i> | Total layer |          | <i>p</i> | Trab/C ratio |         | <i>p</i> |
|---------|--------------|---------|----------|-----------|----------|----------|-------------|----------|----------|--------------|---------|----------|
|         | F            | M       |          | F         | M        |          | F           | M        |          | F            | M       |          |
| 1       | 0.6±0.2      | 0.9±0.2 | 0.22     | 12.6±0.4  | 14.9±0.4 | <0.01    | 13.1±0.4    | 15.9±0.4 | <0.01    | 0            | 0.1±0.0 | 0.45     |
| 2       | 0            | 0       | na       | 13.0±0.4  | 15.1±0.3 | <0.01    | 13.0±0.4    | 15.1±0.3 | <0.01    | 0            | 0       | na       |
| 3       | 0            | 0       | na       | 10.7±0.3  | 12.7±0.3 | <0.01    | 10.7±0.3    | 12.7±0.3 | <0.01    | 0            | 0       | na       |
| 4       | 0.1±0.0      | 0.3±0.1 | 0.13     | 12.2±0.3  | 14.0±0.3 | <0.01    | 12.2±0.3    | 14.4±0.3 | <0.01    | 0*           | 0*      | 0.32     |
| 5       | 0.6±0.1      | 0.6±0.1 | 0.97     | 12.1±0.3  | 14.0±0.3 | <0.01    | 12.7±0.3    | 14.5±0.3 | <0.01    | 0.1±0.0      | 0.1±0.0 | 0.66     |
| 6       | 0.5±0.1      | 0.6±0.2 | 0.47     | 11.9±0.3  | 13.5±0.3 | <0.01    | 12.3±0.3    | 14.2±0.3 | <0.01    | 0.1±0.0      | 0.1±0.0 | 0.67     |
| 7       | 5.3±0.4      | 6.0±0.3 | 0.22     | 10.2±0.4  | 12.5±0.3 | <0.01    | 14.6±0.4    | 17.1±0.4 | <0.01    | 0.5±0.1      | 0.4±0.0 | 0.07     |
| 8       | 0.6±0.2      | 0.3±0.2 | 0.28     | 11.8±0.4  | 14.0±0.3 | <0.01    | 12.4±0.4    | 14.3±0.3 | <0.01    | 0*           | 0*      | 0.68     |
| 9       | 0            | 0       | na       | 11.8±0.3  | 14.0±0.3 | <0.01    | 11.8±0.3    | 14.0±0.3 | <0.01    | 0            | 0       | na       |
| 10      | 1.2±0.3      | 0.7±0.2 | 0.14     | 11.8±0.4  | 13.5±0.3 | <0.01    | 12.4±0.4    | 14.1±0.3 | <0.01    | 0.1±0.0      | 0.1±0.0 | 0.09     |

---

|    |         |         |      |          |          |       |          |          |       |         |         |      |
|----|---------|---------|------|----------|----------|-------|----------|----------|-------|---------|---------|------|
| 11 | 2.8±0.3 | 3.4±0.4 | 0.23 | 10.8±0.4 | 12.6±0.4 | <0.01 | 13.5±0.4 | 16.0±0.4 | <0.01 | 0.3±0.0 | 0.3±0.0 | 0.84 |
| 12 | 2.4±0.3 | 3.2±0.3 | 0.10 | 10.5±0.4 | 12.1±0.3 | <0.01 | 13.0±0.4 | 15.3±0.3 | <0.01 | 0.2±0.0 | 0.3±0.0 | 0.52 |
| 13 | 4.1±0.3 | 4.2±0.3 | 0.91 | 11.1±0.3 | 12.1±0.3 | <0.01 | 15.2±0.3 | 16.4±0.4 | <0.01 | 0.4±0.0 | 0.3±0.0 | 0.30 |
| 14 | 0.5±0.2 | 0.4±0.2 | 0.67 | 12.0±0.3 | 13.5±0.3 | <0.01 | 12.5±0.3 | 14.0±0.3 | <0.01 | 0*      | 0*      | 0.45 |
| 15 | 1.5±0.3 | 1.5±0.3 | 0.93 | 10.6±0.4 | 12.2±0.4 | <0.01 | 12.1±0.4 | 13.7±0.4 | <0.01 | 0.2±0.0 | 0.2±0.0 | 0.47 |
| 16 | 4.8±0.2 | 5.3±0.4 | 0.24 | 10.2±0.3 | 12.3±0.3 | <0.01 | 15.0±0.3 | 17.6±0.5 | <0.01 | 0.5±0.0 | 0.5±0.0 | 0.29 |

---

**Table 5** - Trabecular, compacted and total layer thickening in female and male subjects.

| Segment | Trabecular thickening |       | <i>p</i> | Compacted thickening |      | <i>p</i> | Total layer thickening |      | <i>p</i> |
|---------|-----------------------|-------|----------|----------------------|------|----------|------------------------|------|----------|
|         | F                     | M     |          | F                    | M    |          | F                      | M    |          |
| 1       | -30±7                 | -30±7 | 0.68     | 73±4                 | 71±4 | 0.83     | 45±5                   | 42±4 | ns       |
| 2       | 0                     | 0     | na       | 51±3                 | 46±3 | 0.20     | 48±4                   | 44±4 | ns       |
| 3       | 0                     | 0     | na       | 36±2                 | 33±2 | 0.73     | 30±4                   | 33±3 | ns       |
| 4       | -34±5                 | -51±6 | 0.79     | 96±2                 | 66±3 | 0.28     | 67±6                   | 59±5 | ns       |
| 5       | -30±6                 | -32±7 | 0.48     | 88±5                 | 80±5 | 0.54     | 63±6                   | 59±5 | ns       |
| 6       | -20±7                 | -21±7 | 0.54     | 84±5                 | 72±4 | 0.08     | 59±6                   | 54±5 | ns       |
| 7       | -21±6                 | -20±5 | 0.17     | 75±5                 | 76±4 | 0.80     | 33±3                   | 35±4 | ns       |
| 8       | -7±2                  | -4±1  | 0.56     | 67±4                 | 63±3 | 0.40     | 62±4                   | 60±3 | ns       |
| 9       | 0                     | 0     | na       | 59±4                 | 60±3 | 0.84     | 59±4                   | 57±4 | ns       |
| 10      | -14±6                 | -10±7 | 0.03     | 74±4                 | 74±4 | 0.96     | 60±4                   | 63±5 | ns       |
| 11      | -29±7                 | -24±7 | 0.62     | 88±5                 | 86±5 | 0.76     | 80±9                   | 87±7 | ns       |
| 12      | -42±7                 | -29±6 | 0.18     | 91±6                 | 75±4 | 0.03     | 36±5                   | 36±5 | ns       |
| 13      | -19±5                 | -14±6 | 0.70     | 83±5                 | 90±5 | 0.31     | 36±4                   | 37±5 | ns       |
| 14      | -31±8                 | -33±9 | 0.58     | 84±5                 | 69±5 | 0.03     | 78±6                   | 60±6 | ns       |
| 15      | -31±8                 | -34±7 | 0.83     | 86±6                 | 84±4 | 0.77     | 61±6                   | 65±6 | ns       |
| 16      | -20±5                 | -29±5 | 0.19     | 76±6                 | 94±5 | 0.06     | 26±4                   | 27±4 | ns       |

**Movie 1 Legend:** Typical selection of the basal, mid-cavity and apical movies which was used in selected cases to help locate the boundary between the compact and trabeculated myocardium at end-systole.
